# Supplementary material
Source: Springer Nature journal article supplement (https://www.springermedizin.de/resource/supplementary/12967_2014_1785_MOESM3_ESM.pdf/9574882)

**A.**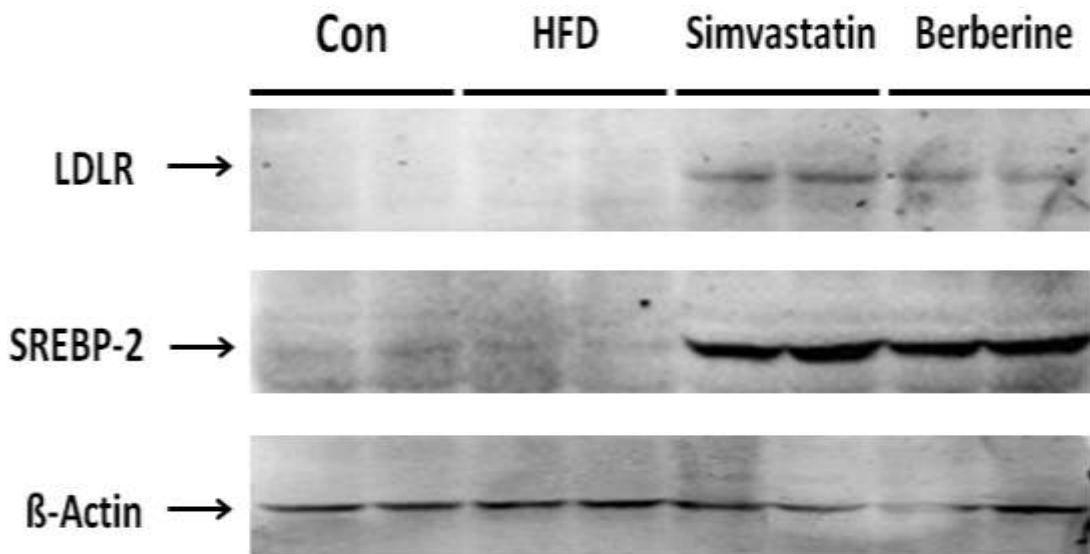**B.**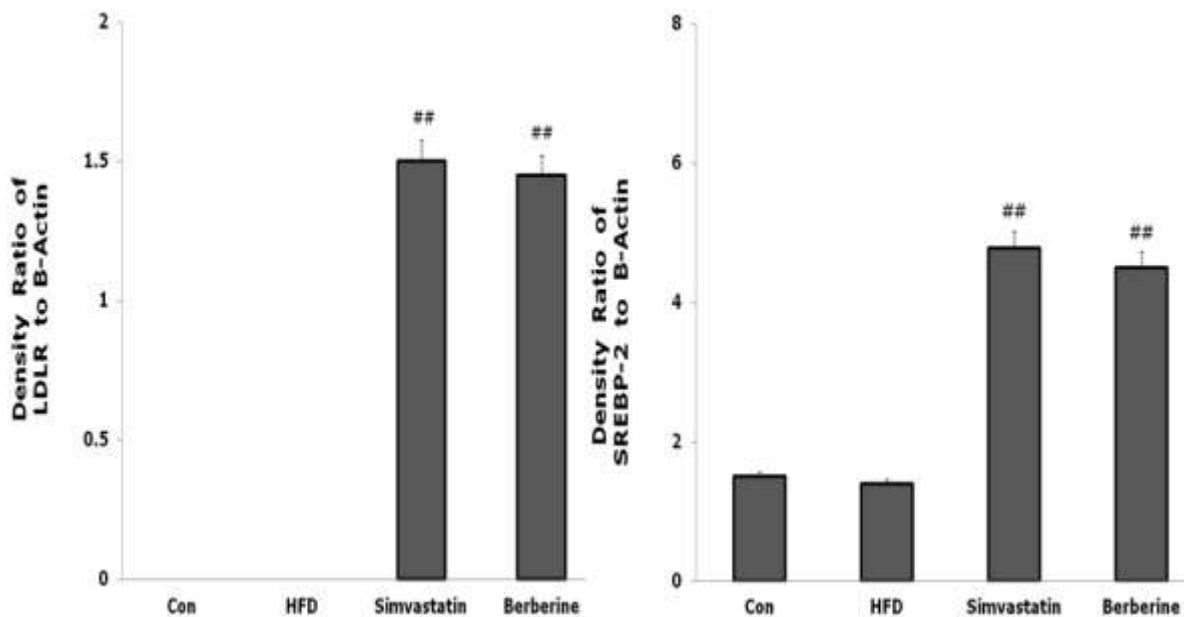

Supplement: MOESM3 [file 9574882]
